# Supplementary material
Source: PubMed Central journal article supplement (PMC6433559)
Supplement: NIHMS990193-supplement-Supp_info.pdf [file NIHMS990193-supplement-Supp_info.pdf]

## Supplemental Information for:

### Association mapping desiccation resistance within chromosomal inversions in the African malaria vector *Anopheles gambiae*

Diego Ayala<sup>1\*†</sup>, Simo Zhang<sup>2\*†</sup>, Mathieu Chateau<sup>3</sup>, Caroline Fouet<sup>3,4</sup>, Isabelle Morlais<sup>3,4</sup>, Carlo Costantini<sup>3,4</sup>, Matthew W. Hahn<sup>2,5†</sup>, Nora Besansky<sup>1†</sup>

<sup>1</sup>Eck Institute for Global Health and Department of Biological Sciences, University of Notre Dame, Notre Dame, IN 46556, USA

<sup>2</sup>Department of Computer Science, Indiana University, Bloomington, IN 47405, USA

<sup>3</sup>Institut de Recherche pour le Développement, MIVEGEC (IRD, CNRS, Univ. Montpellier), 911 Avenue Agropolis, 34394 Montpellier, France

<sup>4</sup>Organisation de Coordination pour la lutte contre les Endémies en Afrique Centrale, BP 288 Yaoundé, Cameroon

<sup>5</sup>Department of Biology, Indiana University, Bloomington, IN 47405, USA

\*These authors contributed equally

†Correspondence: [mwh@indiana.edu](mailto:mwh@indiana.edu), [nbesansk@nd.edu](mailto:nbesansk@nd.edu)

#### Table of Contents:

|                  |        |
|------------------|--------|
| <b>Figure S1</b> | Page 2 |
| <b>Figure S2</b> | Page 3 |
| <b>Figure S3</b> | Page 4 |
| <b>Figure S4</b> | Page 5 |
| <b>Figure S5</b> | Page 6 |
| <b>Table S1</b>  | Page 7 |
| <b>Table S2</b>  | Page 9 |

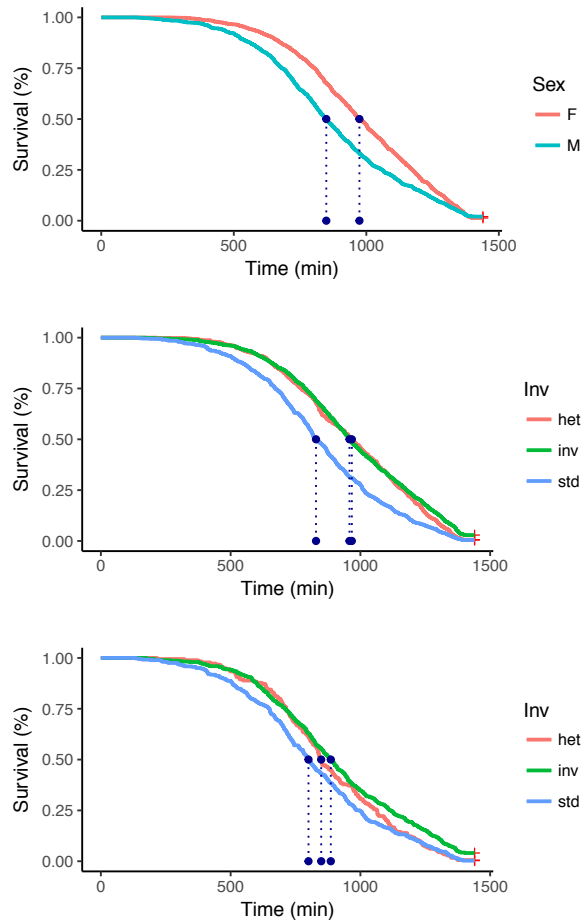

**Figure S1. Survival of teneral adult *An. gambiae* under acute desiccation stress.**

Top, data are stratified by sex (all karyotypes combined). Middle, data are stratified by karyotype (both sexes combined). Bottom, data correspond to males only, and are stratified by karyotype (compare to Figure 1 in main text). These trends are consistent with previous measurements made using laboratory colonies of *An. gambiae*, but natural populations are more resistant to desiccation stress. For example, median survival for inverted homozygotes (both sexes combined) was 958 min (95% confidence interval: 942-981) in our samples compared to 612 min (95% confidence interval: 542-697) in a Cameroonian laboratory colony of *An. gambiae* (Fouet et al., 2012). Similarly, median survival for standard homozygotes was 829 min (95% CI: 812-863) compared to 537 min (95% CI: 506-575) in the corresponding laboratory colony (Fouet et al., 2012).

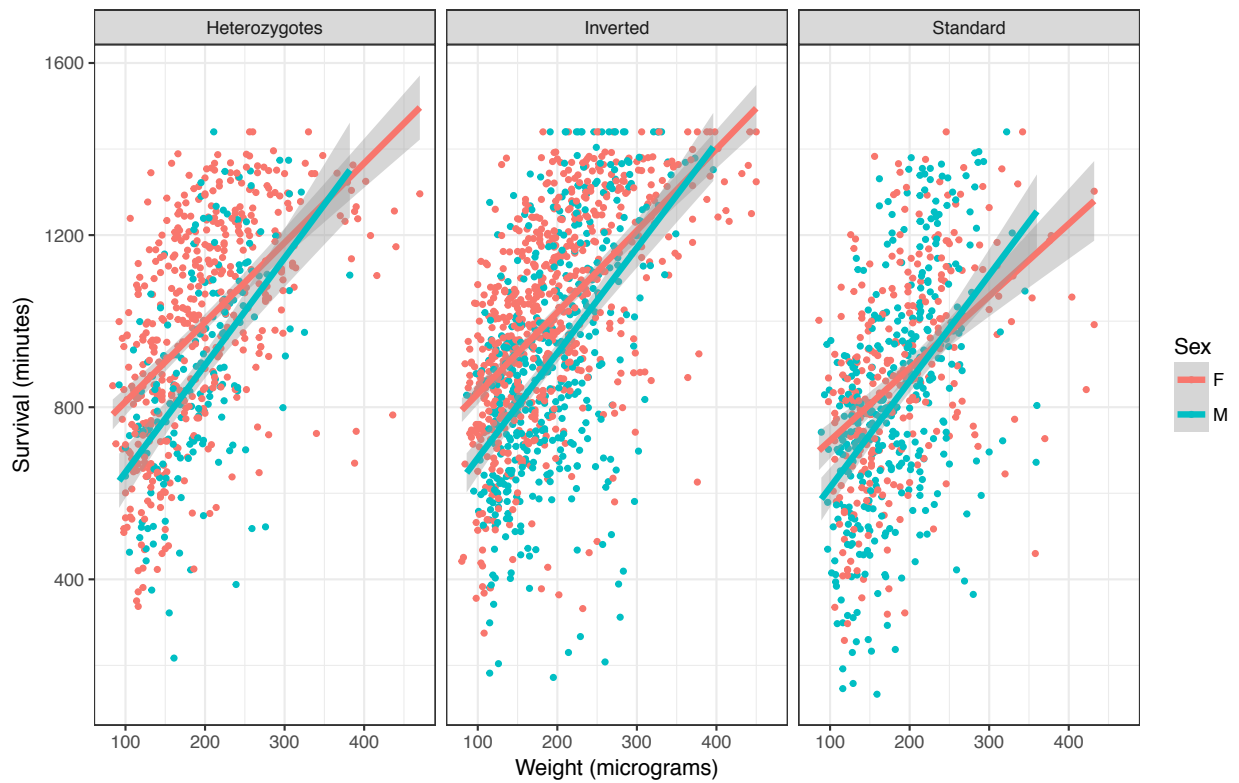

**Figure S2. Survival of teneral adult *An. gambiae* under acute desiccation stress is influenced by body mass.** Correlation between weight and survival in males and females of all three karyotypes was significant ( $F$ -statistic,  $P < 0.001$ ).

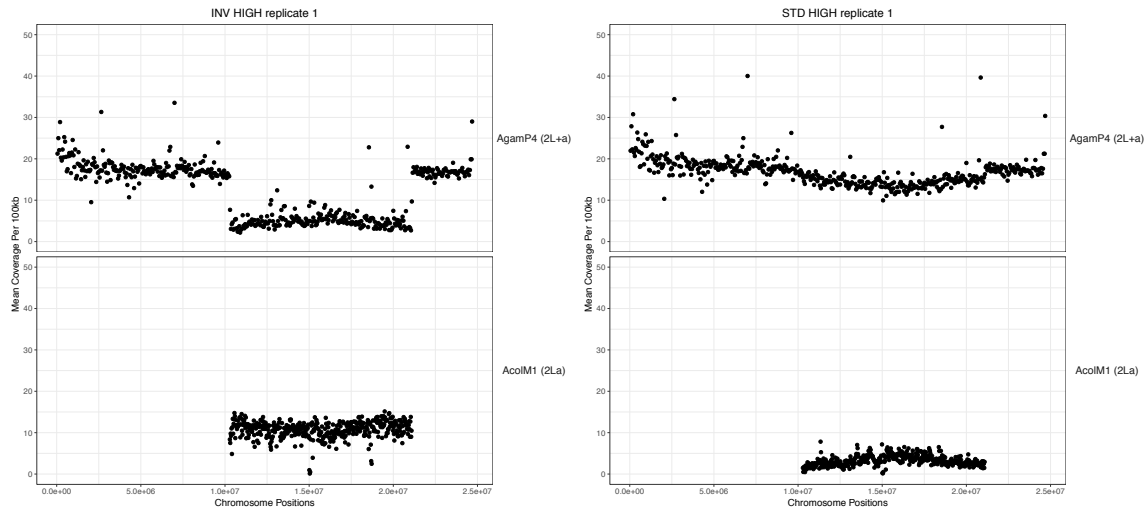

**Figure S3. Chromosome 2L read-mapping coverage depends on karyotype of the reference assembly.** We examined coverage on chromosome 2L using non-overlapping sliding windows (100 kb). Each point represents the average coverage of each 100-kb window. Left: Pseudo-chromosome 2La (derived from the AcoIM1 reference assembly) retained twice as many reads from the INV HIGH pool (=10.8) compared to the 2L<sup>+a</sup> counterpart from the AgamP4 reference assembly (=5.1). Right: The opposite pattern was observed with the STD HIGH pool. In this case, the 2La pseudo-reference retained a mean coverage of 3.2 compared with 14.5 for the 2L<sup>+a</sup> reference. The sum of mean coverage across the two arrangements (15.9 and 17.7 for INV HIGH and STD HIGH, respectively) was comparable to the mean coverage for the rest of chromosome 2L (17.6 and 18.6 for INV HIGH and STD HIGH). The replicate pools further confirmed these observations.

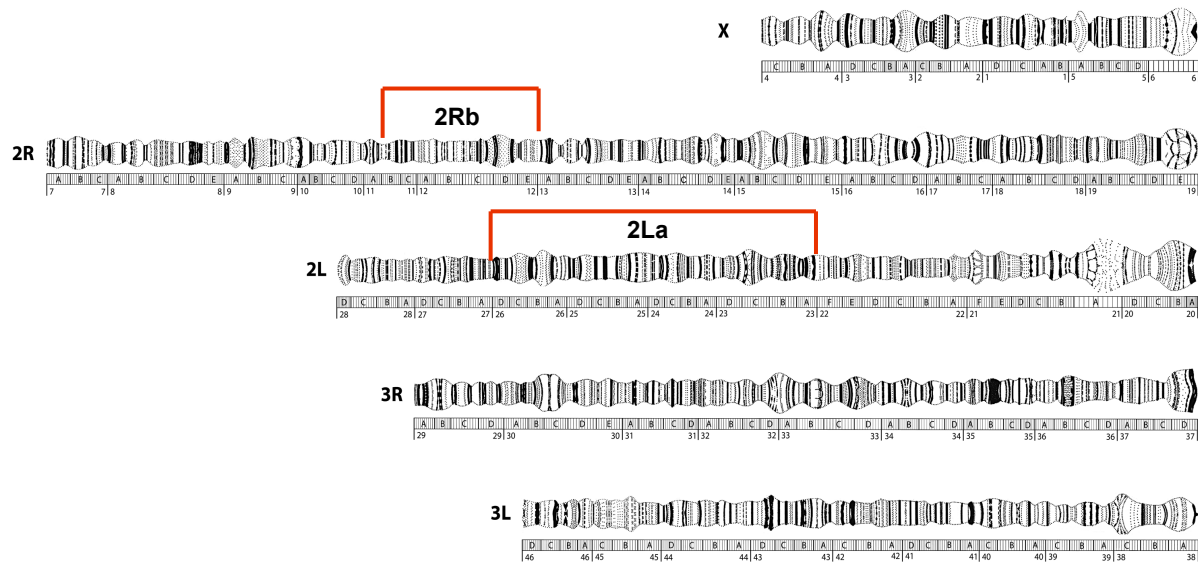

**Figure S4. Genomic extent of In(2La) and In(2Rb).** Polytene chromosomes of the five major chromosomal arms in *An. gambiae*, with the location of inversions 2Rb and 2La shown. For more information on the location of all common and rare inversions in *An. gambiae*, see Pombi et al. (2008), which is also the source for the polytene chromosomes shown here.

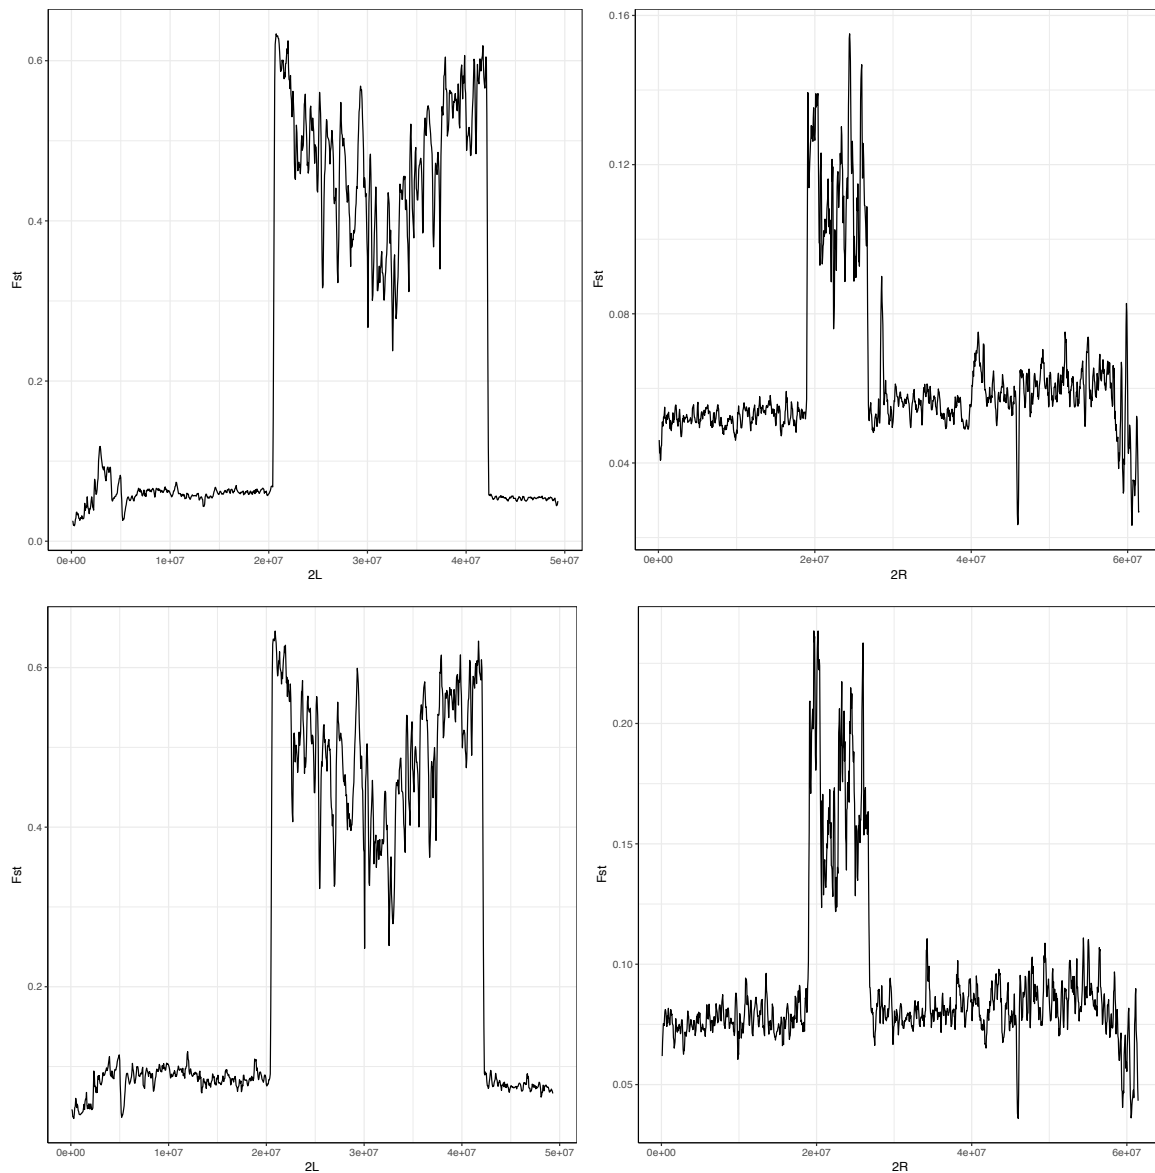

**Figure S5. Sequence differentiation within inversions.** Left, top: Differentiation ( $F_{ST}$ ) between INV HIGH and STD HIGH pools on chromosome 2L. Left, bottom: Differentiation ( $F_{ST}$ ) between INV HIGH and STD LOW pools on chromosome 2L. Right, top: Differentiation ( $F_{ST}$ ) between INV HIGH and STD HIGH pools on chromosome 2R. Right, bottom: Differentiation ( $F_{ST}$ ) between INV HIGH and STD LOW pools on chromosome 2R. In all cases, sharply higher differentiation corresponds to the rearranged region on each arm, regardless of phenotypes. Note the different scales on the y-axis of the left and right graphs.

**Table S1. Gene candidates with significant SNPs mapped within 2La inversion.**

| P-value  | SNP position | Gene       | Variant Type      | Drosophila  | Gene Description <sup>†</sup>                              |
|----------|--------------|------------|-------------------|-------------|------------------------------------------------------------|
| 9.00E-08 | 25195489     | AGAP006026 | 5' UTR            | FBgn0004619 | Glutamate receptor IA                                      |
| 1.22E-06 | 40273766     | AGAP006961 | downstream        | FBgn0001233 | Hsp83                                                      |
| 1.22E-06 | 40273766     | AGAP006962 | upstream          | FBgn0026061 | Multiple inositol polyphosphate phosphatase                |
| 1.22E-06 | 40273766     | AGAP006963 | downstream        | FBgn0027786 | Mitochondrial solute carrier                               |
| 9.02E-06 | 34876498     | AGAP006633 | intron            | FBgn0034135 | Syntrophin-like                                            |
| 1.01E-05 | 25834778     | AGAP006059 | intron            | FBgn0052206 | LDL receptor-like                                          |
| 2.57E-05 | 34101580     | AGAP028608 | upstream          |             |                                                            |
| 2.57E-05 | 34101580     | AGAP006546 | upstream          | FBgn0035360 |                                                            |
| 2.59E-05 | 29813359     | AGAP006330 | intron            | FBgn0042185 | Mitochondrial calcium uniporter                            |
| 2.59E-05 | 29813359     | AGAP006339 | downstream        | FBgn0263973 | javelin                                                    |
| 3.01E-05 | 34271622     | AGAP028458 | synonymous        |             |                                                            |
| 3.01E-05 | 34271622     | AGAP006581 | upstream          |             |                                                            |
| 3.01E-05 | 34271622     | AGAP006582 | upstream          |             |                                                            |
| 3.01E-05 | 34271622     | AGAP006583 | upstream          |             |                                                            |
| 3.01E-05 | 34271622     | AGAP028459 | downstream        |             |                                                            |
| 3.01E-05 | 34271622     | AGAP006584 | downstream        |             |                                                            |
| 3.01E-05 | 34271622     | AGAP006585 | downstream        |             |                                                            |
| 3.01E-05 | 34271622     | AGAP006586 | downstream        |             |                                                            |
| 3.40E-05 | 34101581     | AGAP028608 | upstream          |             |                                                            |
| 3.40E-05 | 34101581     | AGAP006546 | intron            |             |                                                            |
| 3.83E-05 | 24907183     | AGAP006020 | downstream        | FBgn0035187 | tryptophan 5-monoxygenase                                  |
| 5.03E-05 | 28601340     | AGAP029069 | upstream          |             |                                                            |
| 5.03E-05 | 28601340     | AGAP006244 | downstream        | FBgn0035523 | Choline transporter-like                                   |
| 5.03E-05 | 28601340     | AGAP006245 | downstream        | FBgn0035520 | spliceosome complex B                                      |
| 5.03E-05 | 28601340     | AGAP006246 | downstream        | FBgn0033529 | calcium-binding                                            |
| 5.45E-05 | 33888255     | AGAP006526 | intron            | FBgn0063485 | lasp (nebulin)                                             |
| 5.45E-05 | 33888255     | AGAP006527 | upstream          |             |                                                            |
| 5.58E-05 | 28779803     | AGAP006264 | upstream          | FBgn0035922 | peroxin 7                                                  |
| 6.98E-05 | 34957673     | AGAP006634 | intron            | FBgn0011260 | Semaphorin-2A                                              |
| 8.26E-05 | 28487138     | AGAP006218 | intron            | FBgn0035132 | GPRMTH4 (methuselah-like receptor)                         |
| 8.37E-05 | 41040683     | AGAP007027 | upstream          | FBgn0033785 | Scaffold protein containing ankyrin repeats and SAM domain |
| 8.76E-05 | 35730362     | AGAP006654 | upstream          | FBgn0036698 | 3-beta-hydroxysteroid dehydrogenase                        |
| 8.83E-05 | 34270037     | AGAP006580 | downstream        | FBgn0041100 | parkin (E3 ubiquitin ligase)                               |
| 8.83E-05 | 34270037     | AGAP006581 | upstream          |             |                                                            |
| 8.83E-05 | 34270037     | AGAP006582 | 5' UTR/synonymous |             |                                                            |
| 8.83E-05 | 34270037     | AGAP006583 | downstream        |             |                                                            |
| 8.83E-05 | 34270037     | AGAP006584 | downstream        |             |                                                            |
| 8.83E-05 | 34270037     | AGAP006585 | downstream        |             |                                                            |
| 8.83E-05 | 34270037     | AGAP028458 | downstream        |             |                                                            |
| 8.83E-05 | 34270037     | AGAP028459 | downstream        |             |                                                            |
| 9.63E-05 | 28713879     | AGAP006260 | downstream/intron | Zasp66      | alpha actinin-binding                                      |
| 1.04E-04 | 28542644     | AGAP006225 | downstream        | FBgn0038350 | aldehyde oxidase                                           |
| 1.04E-04 | 28542644     | AGAP006226 | synonymous        | FBgn003835  | aldehyde oxidase                                           |
| 1.04E-04 | 28542644     | AGAP006227 | downstream        | gasoline    | carboxylesterase                                           |
| 1.12E-04 | 41032872     | AGAP007025 | downstream        | FBgn0050001 | Fanconi anaemia group A protein                            |
| 1.12E-04 | 41032872     | AGAP007026 | upstream          | FBgn0010531 | copper chaperone for superoxide dismutase (Ccs)            |
| 1.12E-04 | 41032872     | AGAP007027 | downstream        |             |                                                            |
| 1.20E-04 | 28065761     | AGAP006188 | intron            | FBgn0035802 | Puratrophin-1-like; RhoGEF                                 |
| 1.40E-04 | 30510772     | AGAP006364 | synonymous        | FBgn0035244 | ATP binding cassette transporter (ABCB4)                   |
| 1.40E-04 | 30510772     | AGAP006365 | upstream          | tsunagi     | spliceosome complex C                                      |
| 1.40E-04 | 30510772     | AGAP013401 | downstream        | FBgn0053230 | peptidyl-lysine methylation                                |
| 1.75E-04 | 28942266     | AGAP006270 | intron            | FBgn0264959 | SRC tyrosine kinase                                        |
| 1.84E-04 | 40247869     | AGAP006956 | intron            | FBgn0034972 | COE100                                                     |
| 1.91E-04 | 22289023     | AGAP005832 | intron            | FBgn0034075 | Aspartyl beta-hydroxylase                                  |
| 1.97E-04 | 32232683     | AGAP006448 | intron            | FBgn0259243 | PKA-R1                                                     |
| 2.17E-04 | 23141642     | AGAP005883 | downstream        | FBgn0036685 |                                                            |
| 2.17E-04 | 23141642     | AGAP005884 | upstream          | FBgn0052380 | sphingomyelin synthase                                     |
| 2.21E-04 | 34077483     | AGAP006540 | downstream        | FBgn0013751 | arrowhead (LIM homeobox protein)                           |
| 2.21E-04 | 34077483     | AGAP006541 | upstream/intron   | FBgn0036117 | aminotransferase                                           |
| 2.21E-04 | 34077483     | AGAP006542 | downstream        | FBgn0031114 | Cactin (spliceosome complex C)                             |

# MOLECULAR ECOLOGY

|                 |          |            |        |             |        |
|-----------------|----------|------------|--------|-------------|--------|
| <b>2.40E-04</b> | 39234911 | AGAP006867 | intron | FBgn0036880 | CPR141 |
| <b>2.41E-04</b> | 28065781 | AGAP006188 | intron |             |        |
| <b>2.58E-04</b> | 22289028 | AGAP005832 | intron |             |        |

†blank gene description means no available function annotation



**Table S2. Gene candidates with significant SNPs mapped within 2Rb inversion.**

| P-value    | SNP Position | Gene       | Variant Type      | Drosophila  | Description†                                                                                                                                       |
|------------|--------------|------------|-------------------|-------------|----------------------------------------------------------------------------------------------------------------------------------------------------|
| 0.00000126 | 23164879     | AGAP002578 | intron            | FBgn0263111 | cacophony; voltage-dependent p/q type calcium channel                                                                                              |
| 0.00000164 | 21489892     | AGAP002444 | downstream        |             | GPROP2; pteropsin                                                                                                                                  |
| 0.00000264 | 20780850     | AGAP002372 | intron            | FBgn0003267 | rough; Hox-like homeobox transcription factor                                                                                                      |
| 0.00000533 | 26592984     | AGAP002744 | intron            | FBgn0040359 |                                                                                                                                                    |
| 0.00000533 | 26592984     | AGAP013160 | downstream        |             |                                                                                                                                                    |
| 0.00000609 | 21934742     | AGAP002487 | upstream          | FBgn0052532 | Paired-like homeobox transcription factor                                                                                                          |
| 0.00000865 | 25505947     | AGAP002677 | intron            | FBgn0083946 | coiled-coil domain-containing protein lobo (lost boys) homolog; transglutaminase; dynein regulatory complex subunit 7                              |
| 0.0000119  | 22873334     | AGAP002562 | upstream          |             | tRNA-Ala                                                                                                                                           |
| 0.0000119  | 22873334     | AGAP002563 | downstream        | FBgn0037326 | Ras-like protein family member 10B precursor                                                                                                       |
| 0.0000119  | 22873334     | AGAP002564 | upstream          | FBgn0000064 | fructose-bisphosphate aldolase, class I                                                                                                            |
| 0.00001453 | 22796341     | AGAP002556 | upstream          | FBgn0011282 | Obp66; odorant-binding protein 66                                                                                                                  |
| 0.00001453 | 22796341     | AGAP002557 | downstream        | FBgn0001112 | gld; glucose dehydrogenase (acceptor)                                                                                                              |
| 0.00001453 | 22796341     | AGAP013111 | synonymous        |             |                                                                                                                                                    |
| 0.00001453 | 22796341     | AGAP013222 | upstream          |             |                                                                                                                                                    |
| 0.0000147  | 20009436     | AGAP002335 | upstream          | FBgn0005649 | nucleolysin TIA-1/TIAR                                                                                                                             |
| 0.00001871 | 21209074     | AGAP002425 | downstream        | FBgn0036975 | cysteine sulfinic acid decarboxylase                                                                                                               |
| 0.00001871 | 21209074     | AGAP002426 | upstream          | FBgn0035243 | Protein OPI10 homolog                                                                                                                              |
| 0.00001871 | 21209074     | AGAP002427 | upstream          | FBgn0004380 | klp64D; kinesin family member 3/17                                                                                                                 |
| 0.00001871 | 21209074     | AGAP002428 | downstream        | FBgn0036433 |                                                                                                                                                    |
| 0.00001912 | 26241026     | AGAP002721 | upstream          | FBgn0003965 | v (vermillion); tryptophan 2,3-dioxygenase                                                                                                         |
| 0.00001912 | 26241026     | AGAP002722 | synonymous        |             | odorant receptor (Or28)                                                                                                                            |
| 0.00001912 | 26241026     | AGAP002723 | upstream          | FBgn0052544 |                                                                                                                                                    |
| 0.00001987 | 24528329     | AGAP002628 | intron            | FBgn0085382 | Fibronectin III/immunoglobulin subtype 2                                                                                                           |
| 0.00001989 | 20385010     | AGAP002342 | intron            |             |                                                                                                                                                    |
| 0.00002513 | 21004295     | AGAP002411 | intron            | FBgn0020278 | Loco (locomotion defects); regulator of G protein signaling; in Drosophila, roles include response to stress, starvation, and temperature stimulus |
| 0.00002957 | 22852527     | AGAP002560 | intron            | FBgn0037324 | odorant receptor obligate co-receptor (Orco, Or7)                                                                                                  |
| 0.00002957 | 22852527     | AGAP002561 | downstream        |             | tRNA-Ala                                                                                                                                           |
| 0.00003237 | 19894062     | AGAP002327 | downstream        | FBgn0042179 | glucosyl/glucuronosyl transferases                                                                                                                 |
| 0.00003237 | 19894062     | AGAP012947 | downstream        | FBgn0039027 |                                                                                                                                                    |
| 0.00003237 | 19894062     | AGAP002328 | upstream          | FBgn0030797 |                                                                                                                                                    |
| 0.00003701 | 20545039     | AGAP002352 | downstream/intron | FBgn0039044 | p53 transcription factor                                                                                                                           |
| 0.00003701 | 20545039     | AGAP002353 | upstream          |             | lipase                                                                                                                                             |
| 0.00003739 | 26592585     | AGAP002744 | intron            |             |                                                                                                                                                    |
| 0.00004798 | 24165003     | AGAP002614 | intron            |             | splicing factor, arginine/serine-rich 16                                                                                                           |
| 0.00004867 | 22445479     | AGAP002530 | upstream          |             | poly(ADP-ribose) glycohydrolase ARH3                                                                                                               |
| 0.00004867 | 22445479     | AGAP002531 | downstream        | FBgn0263602 | taspase, threonine aspartase, 1                                                                                                                    |
| 0.00004867 | 22445479     | AGAP002532 | downstream        | FBgn0010317 | CycJ; cyclin J                                                                                                                                     |
| 0.00004867 | 22445479     | AGAP002533 | upstream          | FBgn0002283 | polycomb group RING finger protein 3                                                                                                               |
| 0.00004867 | 22445479     | AGAP002534 | downstream        | FBgn0035964 | Dhpr; dihydropteridine reductase                                                                                                                   |
| 0.00004995 | 21004288     | AGAP002411 | intron            |             |                                                                                                                                                    |
| 0.00005171 | 22461451     | AGAP002537 | downstream        | FBgn0038901 | Bursicon; component of bursicon neurohormone                                                                                                       |
| 0.0000528  | 23019258     | AGAP002573 | intron            |             | GTPase-activating Rap/Ran-GAP domain-like protein 3                                                                                                |
| 0.00005779 | 25208441     | AGAP002657 | upstream          | FBgn0031094 |                                                                                                                                                    |
| 0.00005779 | 25208441     | AGAP002658 | downstream        | FBgn0000426 | small nuclear ribonucleoprotein polypeptide F; mRNA splicing                                                                                       |
| 0.00005779 | 25208441     | AGAP002659 | upstream          | FBgn0030756 | solute carrier family 10 (sodium/bile acid cotransporter)                                                                                          |
| 0.00005779 | 25208441     | AGAP002660 | downstream        |             | tRNA-Glu                                                                                                                                           |
| 0.00005779 | 25208441     | AGAP002661 | upstream          | FBgn0031092 | delta(3,5)-Delta(2,4)-dienoyl-CoA isomerase                                                                                                        |
| 0.00005779 | 25208441     | AGAP002662 | downstream        | FBgn0038649 | CDP-diacylglycerol--glycerol-3-phosphate 3-phosphatidyltransferase                                                                                 |
| 0.00006072 | 24970806     | AGAP002647 | intron            | FBgn0011754 | phosphorylase kinase gamma subunit                                                                                                                 |
| 0.00007603 | 19393501     | AGAP002315 | intron            | FBgn0039705 | APG16L, autophagy related gene                                                                                                                     |
| 0.00008807 | 25208466     | AGAP002657 | upstream          |             |                                                                                                                                                    |
| 0.00008807 | 25208466     | AGAP002658 | downstream        |             |                                                                                                                                                    |
| 0.00008807 | 25208466     | AGAP002659 | upstream          |             |                                                                                                                                                    |
| 0.00008807 | 25208466     | AGAP002660 | downstream        |             |                                                                                                                                                    |
| 0.00008807 | 25208466     | AGAP002661 | upstream          |             |                                                                                                                                                    |

# MOLECULAR ECOLOGY

|            |          |            |                      |             |                                                                                         |
|------------|----------|------------|----------------------|-------------|-----------------------------------------------------------------------------------------|
| 0.00008807 | 25208466 | AGAP002662 | downstream           |             |                                                                                         |
| 0.00008867 | 20790883 | AGAP002374 | 3' UTR               | FBgn0001215 | heterogeneous nuclear ribonucleoprotein A1/A3                                           |
| 0.00008867 | 20790883 | AGAP002375 | downstream           | FBgn0038903 | DNA-directed RNA polymerase I subunit RPA12                                             |
| 0.00008867 | 20790883 | AGAP002376 | downstream           |             |                                                                                         |
| 0.0001082  | 23187621 | AGAP002578 | intron               |             | -                                                                                       |
| 0.00012045 | 19894050 | AGAP002327 | downstream           |             |                                                                                         |
| 0.00012045 | 19894050 | AGAP002328 | upstream             |             |                                                                                         |
| 0.00012045 | 19894050 | AGAP012947 | downstream           | FBgn0039028 |                                                                                         |
| 0.00012982 | 23048372 | AGAP002573 | intron               |             |                                                                                         |
| 0.00014449 | 24942280 | AGAP002644 | downstream           | FBgn0037989 | ATP8B; phospholipid-translocating ATPase                                                |
| 0.00014449 | 24942280 | AGAP002645 | downstream           | FBgn0011710 | septin 2; GTPases involved in cytokinesis, trafficking                                  |
| 0.00014909 | 26593970 | AGAP002744 | intron               |             |                                                                                         |
| 0.00014909 | 26593970 | AGAP013160 | downstream           |             |                                                                                         |
| 0.00015911 | 23187640 | AGAP002578 | intron               |             |                                                                                         |
| 0.00016548 | 23185405 | AGAP002578 | intron               |             | -                                                                                       |
| 0.00016931 | 24564700 | AGAP002629 | upstream             | FBgn0030999 | Mur18B (mucin-related 18B); chitin-binding; chitin metabolism                           |
| 0.00017077 | 20969379 | AGAP002403 | downstream           | FBgn0039632 | cullin 5; nucleoside diphosphate-linked moiety X motif 18                               |
| 0.00017077 | 20969379 | AGAP002404 | upstream             | FBgn0039632 | cullin 5; nucleoside diphosphate-linked moiety X motif 18                               |
| 0.00017077 | 20969379 | AGAP002405 | downstream           | FBgn0037378 |                                                                                         |
| 0.00017819 | 23048368 | AGAP002573 | intron               |             |                                                                                         |
| 0.00018003 | 23187985 | AGAP002578 | intron               |             | -                                                                                       |
| 0.00019025 | 26673777 | AGAP002751 | downstream           |             |                                                                                         |
| 0.00019025 | 26673777 | AGAP002752 | downstream           |             | DnaJ (Hsp40) homolog, subfamily C, member 3                                             |
| 0.00019025 | 26673777 | AGAP002753 | splice region/intron |             |                                                                                         |
| 0.00019025 | 26673777 | AGAP002754 | upstream             | FBgn0037328 | RpL35a; 60S ribosomal protein L35a                                                      |
| 0.00019361 | 20213704 | AGAP002336 | upstream             | FBgn0032484 | kek4 (kekkon4); transmembrane leucine-rich repeat (LRR) and immunoglobulin-like protein |
| 0.0002011  | 20385413 | AGAP002342 | intron               |             |                                                                                         |
| 0.00021119 | 19894069 | AGAP002327 | downstream           |             |                                                                                         |
| 0.00021119 | 19894069 | AGAP002328 | upstream             |             |                                                                                         |
| 0.00021119 | 19894069 | AGAP012947 | downstream           |             |                                                                                         |
| 0.00021686 | 23313805 | AGAP002587 | upstream             | FBgn0031010 |                                                                                         |
| 0.00021686 | 23313805 | AGAP002588 | downstream           |             |                                                                                         |
| 0.00024263 | 19224936 | AGAP002312 | downstream           | FBgn0051301 |                                                                                         |
| 0.00024263 | 19224936 | AGAP002313 | upstream             | FBgn0051301 |                                                                                         |
| 0.00024263 | 19224936 | AGAP002314 | downstream           |             |                                                                                         |
| 0.00024378 | 22833655 | AGAP002559 | intron               | FBgn0037323 | alpha-tocopherol transfer protein-like                                                  |
| 0.00024815 | 23108081 | AGAP002575 | upstream             | FBgn0030357 | ScIp; leucine-rich repeat                                                               |
| 0.00024856 | 19290051 | AGAP002315 | intron               | FBgn0039705 |                                                                                         |
| 0.00025044 | 25630141 | AGAP029101 | splice region/intron |             |                                                                                         |
| 0.00025044 | 25630141 | AGAP002689 | downstream           | FBgn0260440 | Spdo (sanpodo); 4-pass transmembrane protein                                            |
| 0.00026453 | 23054521 | AGAP002573 | intron               |             |                                                                                         |
| 0.00027212 | 23167232 | AGAP002578 | synonymous           |             | -                                                                                       |
| 0.00027513 | 19614290 | AGAP002325 | intron               | FBgn0017590 | Klg (Klingon); fibronectin type III, immunoglobulin subtype 2                           |
| 0.0002912  | 20975140 | AGAP002404 | downstream           |             |                                                                                         |
| 0.0002912  | 20975140 | AGAP002405 | upstream             |             |                                                                                         |
| 0.0002912  | 20975140 | AGAP002406 | intron               | FBgn0038586 | COMM domain-containing protein 2                                                        |
| 0.0002912  | 20975140 | AGAP002407 | downstream           | FBgn0051450 | mRpS18; Mitochondrial ribosomal protein S18A                                            |
| 0.0002912  | 20975140 | AGAP002408 | upstream             | FBgn0037652 |                                                                                         |
| 0.0002912  | 20975140 | AGAP002409 | downstream           | FBgn0038811 | tRNA pseudouridine38-40 synthase                                                        |
| 0.00029175 | 20531506 | AGAP002350 | downstream           | FBgn0004169 | troponin T, fast skeletal muscle                                                        |
| 0.00029175 | 20531506 | AGAP002351 | splice region        | FBgn0039120 | nuclear pore complex protein Nup98-Nup96                                                |
| 0.00029339 | 26587511 | AGAP002744 | downstream           |             |                                                                                         |
| 0.00029339 | 26587511 | AGAP013298 | upstream             |             |                                                                                         |
| 0.00029891 | 22833653 | AGAP002559 | intron               |             |                                                                                         |
| 0.00031556 | 22964231 | AGAP002566 | upstream             | FBgn0039419 | GPRHIS; putative histamine receptor                                                     |
| 0.00032869 | 23586276 | AGAP002591 | intron               | FBgn0053207 | Pxb; role in memory and behavior in Drosophila                                          |
| 0.00034347 | 20860722 | AGAP002382 | intron               |             |                                                                                         |
| 0.00034347 | 20860722 | AGAP002383 | downstream           | FBgn0027083 | methionyl-tRNA synthetase                                                               |
| 0.00043349 | 19074130 | AGAP002309 | downstream           | FBgn0267449 | WD repeat-containing protein                                                            |

# MOLECULAR ECOLOGY

|            |          |            |            |             |                                                                                                                                                                     |
|------------|----------|------------|------------|-------------|---------------------------------------------------------------------------------------------------------------------------------------------------------------------|
| 0.00043349 | 19074130 | AGAP002310 | downstream | FBgn0039709 | protocadherin-15                                                                                                                                                    |
| 0.00046668 | 25501338 | AGAP002677 | intron     |             |                                                                                                                                                                     |
| 0.00046749 | 24934392 | AGAP002644 | intron     |             | phospholipid-translocating ATPase                                                                                                                                   |
| 0.00048124 | 24808367 | AGAP002635 | upstream   |             | GR13; gustatory receptor 13                                                                                                                                         |
| 0.0004868  | 25631822 | AGAP002688 | intron     |             |                                                                                                                                                                     |
| 0.0004868  | 25631822 | AGAP002689 | downstream |             |                                                                                                                                                                     |
| 0.0004868  | 25631822 | AGAP029101 | intron     |             |                                                                                                                                                                     |
| 0.00048824 | 19947191 | AGAP002329 | downstream | FBgn0039543 | carnitine O-octanoyltransferase                                                                                                                                     |
| 0.00048824 | 19947191 | AGAP002330 | downstream | FBgn0039233 | 60S ribosome subunit biogenesis protein NIP7                                                                                                                        |
| 0.00048824 | 19947191 | AGAP013359 | downstream |             |                                                                                                                                                                     |
| 0.00048824 | 19947191 | AGAP013453 | upstream   |             |                                                                                                                                                                     |
| 0.00052752 | 21595437 | AGAP002458 | downstream |             |                                                                                                                                                                     |
| 0.00052752 | 21595437 | AGAP013018 | downstream | FBgn0053096 | Abhydrolase domain-containing protein FAM108B1                                                                                                                      |
| 0.00053027 | 26444854 | AGAP002739 | downstream | FBgn0031879 | Uif (uninflatable); transmembrane protein, EGF-like; C-type lectin-like; LDL receptor class A-like                                                                  |
| 0.00053027 | 26444854 | AGAP002740 | upstream   |             | FAD synthetase                                                                                                                                                      |
| 0.00053027 | 26444854 | AGAP002741 | downstream |             | histone-lysine N-methyltransferase MLL1                                                                                                                             |
| 0.00053027 | 26444854 | AGAP013044 | downstream | FBgn0015621 | (clipper); cleavage and polyadenylation specificity factor subunit 4; in Drosophila, pre-mRNA cleavage required for polyadenylation                                 |
| 0.00053395 | 26677136 | AGAP002752 | downstream | FBgn0037718 | P581PK; DnaJ (Hsp40) homolog                                                                                                                                        |
| 0.00053395 | 26677136 | AGAP002753 | downstream |             |                                                                                                                                                                     |
| 0.00053395 | 26677136 | AGAP002754 | downstream |             |                                                                                                                                                                     |
| 0.00053792 | 24951815 | AGAP002645 | intron     |             |                                                                                                                                                                     |
| 0.00053792 | 24951815 | AGAP013050 | downstream |             |                                                                                                                                                                     |
| 0.00053792 | 24951815 | AGAP013113 | downstream |             |                                                                                                                                                                     |
| 0.00053792 | 24951815 | AGAP013264 | downstream |             |                                                                                                                                                                     |
| 0.00053792 | 24951815 | AGAP013369 | upstream   |             |                                                                                                                                                                     |
| 0.00053792 | 24951815 | AGAP013448 | upstream   |             |                                                                                                                                                                     |
| 0.00054488 | 21004279 | AGAP002411 | intron     |             |                                                                                                                                                                     |
| 0.00056482 | 22852328 | AGAP002560 | intron     |             |                                                                                                                                                                     |
| 0.00056482 | 22852328 | AGAP002561 | downstream |             |                                                                                                                                                                     |
| 0.00056983 | 22171914 | AGAP002512 | downstream | FBgn0036964 | Actin crosslinking; protein FRG1 family                                                                                                                             |
| 0.00056983 | 22171914 | AGAP002513 | downstream | FBgn0036967 | SCCRO4 (Squamous cell carcinoma-related oncogene 4); negative regulation of protein neddylation; positive regulation of ubiquitin-protein transferase activity      |
| 0.00056983 | 22171914 | AGAP002514 | upstream   |             |                                                                                                                                                                     |
| 0.00057309 | 22964255 | AGAP002566 | upstream   |             |                                                                                                                                                                     |
| 0.00057409 | 23187926 | AGAP002578 | intron     |             |                                                                                                                                                                     |
| 0.00057541 | 20387364 | AGAP002342 | intron     |             |                                                                                                                                                                     |
| 0.00057973 | 26449098 | AGAP002740 | upstream   |             |                                                                                                                                                                     |
| 0.00057973 | 26449098 | AGAP002741 | intron     | FBgn0003862 | Trx (trithorax); chromatin modification (histone methyltransferase, H3-K4 specific)                                                                                 |
| 0.00060192 | 25507301 | AGAP002677 | intron     |             |                                                                                                                                                                     |
| 0.00061725 | 20509039 | AGAP002347 | upstream   | FBgn0031099 | N-acetylglucosamine-6-phosphate deacetylase                                                                                                                         |
| 0.00061725 | 20509039 | AGAP002348 | upstream   | FBgn0030789 | exosome complex component RRP45; exoribonuclease                                                                                                                    |
| 0.00061725 | 20509039 | AGAP002349 | missense   |             | piggyBac-derived 1                                                                                                                                                  |
| 0.00063945 | 23005717 | AGAP002569 | downstream | FBgn0028399 | TMS1 (Target of methylation-induced silencing 1); L-serine transmembrane transporter activity                                                                       |
| 0.00063945 | 23005717 | AGAP002570 | upstream   | FBgn0036629 | GluRS-m; glutamyl-tRNA synthetase                                                                                                                                   |
| 0.00063945 | 23005717 | AGAP002571 | 5' UTR     | FBgn0038524 | Slalom (Sll); in Drosophila, transporter of 3'-phosphoadenosine 5'-phosphosulfate; sulfation of glycans and proteins, regulation of Hh, Wingless signaling pathways |
| 0.00064663 | 20864882 | AGAP002381 | upstream   | FBgn0039734 | Tace; disintegrin and metalloproteinase domain-containing protein 17                                                                                                |
| 0.00064663 | 20864882 | AGAP002382 | downstream |             |                                                                                                                                                                     |
| 0.00064663 | 20864882 | AGAP002383 | intron     |             |                                                                                                                                                                     |
| 0.00064663 | 20864882 | AGAP002384 | downstream | FBgn0037250 | tRNA (guanine10-N2)-methyltransferase                                                                                                                               |
| 0.00065294 | 23822497 | AGAP002601 | downstream | FBgn0028999 | nerfin-1 (nervous fingers); Zinc finger C2H2 transcription factor                                                                                                   |
| 0.00065294 | 23822497 | AGAP002602 | upstream   | FBgn0024194 | Rasp; acyltransferase; in Drosophila, adds essential N-terminal palmitate modifications to the secreted signaling domains of hedgehog and spitz (EGFR ligand).      |

# MOLECULAR ECOLOGY

|            |          |            |            |             |                                                                                                                                                         |
|------------|----------|------------|------------|-------------|---------------------------------------------------------------------------------------------------------------------------------------------------------|
| 0.00065294 | 23822497 | AGAP002603 | upstream   | FBgn0042712 | HBS1; elongation factor 1 alpha-like protein                                                                                                            |
| 0.00065294 | 23822497 | AGAP013296 | downstream | FBgn0039305 | Peptidyl-prolyl cis-trans isomerase NIMA-interacting 4                                                                                                  |
| 0.00066899 | 21231646 | AGAP002429 | upstream   | FBgn0003388 | Shd (shade); cytochrome P450 Halloween gene; ecdysteroid biosynthesis                                                                                   |
| 0.00070341 | 20886116 | AGAP002388 | upstream   | FBgn0032907 | endonuclease III                                                                                                                                        |
| 0.00070341 | 20886116 | AGAP002389 | downstream | FBgn0038571 | ubiquitin-like 4A                                                                                                                                       |
| 0.00070341 | 20886116 | AGAP002390 | downstream | FBgn0039730 |                                                                                                                                                         |
| 0.00070341 | 20886116 | AGAP002391 | upstream   | FBgn0039084 | COEAE5O; carboxylesterase                                                                                                                               |
| 0.00072003 | 21376601 | AGAP002434 | downstream | FBgn0013765 | centrosomin                                                                                                                                             |
| 0.00072003 | 21376601 | AGAP002436 | downstream | FBgn0013765 | isopeptidase-T-3; Kip1 ubiquitination-promoting complex protein 2                                                                                       |
| 0.00072738 | 21032768 | AGAP002413 | downstream | FBgn0250753 | Krasavietz (Kra); translational regulator that interacts with eIF-2B; in Drosophila, involved in axon guidance, long-term memory, and alcohol addiction |
| 0.00072738 | 21032768 | AGAP002414 | downstream | FBgn0004648 | Svr (silver); carboxypeptidase D                                                                                                                        |
| 0.00073128 | 25501343 | AGAP002677 | intron     |             |                                                                                                                                                         |
| 0.00073866 | 23258098 | AGAP013206 | upstream   | FBgn0002306 | Sas (stranded at second); fibronectin III-like; immunoglobulin-like fold; In Drosophila, involved in response to stimulus                               |
| 0.00075762 | 23070605 | AGAP002572 | downstream |             |                                                                                                                                                         |
| 0.00075762 | 23070605 | AGAP002573 | intron     |             |                                                                                                                                                         |
| 0.00076122 | 23831089 | AGAP002603 | downstream |             |                                                                                                                                                         |
| 0.00076122 | 23831089 | AGAP002604 | synonymous | FBgn0085290 |                                                                                                                                                         |
| 0.00076122 | 23831089 | AGAP002605 | upstream   | FBgn0026751 | DNA-repair protein XRCC1                                                                                                                                |
| 0.00076122 | 23831089 | AGAP002606 | downstream | FBgn0036465 | 26S proteasome regulatory subunit N12                                                                                                                   |
| 0.00076122 | 23831089 | AGAP012994 | downstream |             |                                                                                                                                                         |
| 0.00076122 | 23831089 | AGAP013156 | downstream |             |                                                                                                                                                         |
| 0.00076122 | 23831089 | AGAP013296 | upstream   |             |                                                                                                                                                         |
| 0.00078211 | 23291545 | AGAP002585 | downstream |             |                                                                                                                                                         |
| 0.00078211 | 23291545 | AGAP002586 | downstream | FBgn0266064 | GlyS; glycogen(starch) synthase                                                                                                                         |
| 0.00078761 | 21002977 | AGAP002411 | intron     |             | regulator of G-protein signaling                                                                                                                        |
| 0.0007978  | 22879484 | AGAP002564 | intron     |             |                                                                                                                                                         |
| 0.00079965 | 22852333 | AGAP002560 | intron     |             |                                                                                                                                                         |
| 0.00079965 | 22852333 | AGAP002561 | downstream |             |                                                                                                                                                         |
| 0.00080024 | 21959673 | AGAP002487 | downstream |             |                                                                                                                                                         |
| 0.00080024 | 21959673 | AGAP002488 | downstream | FBgn0261573 | CoRest; SANT-MYB domain transcription regulator; component of chromatin remodelling complexes and co-repressors                                         |
| 0.0008171  | 25152876 | AGAP002651 | synonymous | FBgn0266717 | Bruce; inhibitor of apoptosis (IAP6); ubiquitin-conjugating (E2) enzyme; in Drosophila, responds to nutrient levels                                     |
| 0.00082995 | 20795151 | AGAP002374 | upstream   |             |                                                                                                                                                         |
| 0.00082995 | 20795151 | AGAP002375 | downstream |             |                                                                                                                                                         |
| 0.00082995 | 20795151 | AGAP002376 | downstream |             |                                                                                                                                                         |
| 0.00082995 | 20795151 | AGAP013161 | downstream | FBgn0037548 | Fatty-acid amide hydrolase 2                                                                                                                            |
| 0.00083425 | 23650680 | AGAP002591 | intron     |             |                                                                                                                                                         |
| 0.00084014 | 26329251 | AGAP002732 | intron     |             |                                                                                                                                                         |
| 0.0008573  | 21317121 | AGAP002431 | intron     | FBgn0040318 | HGTX; homeodomain transcription factor; in Drosophila, major roles include neuronal specification and differentiation                                   |
| 0.00086079 | 20969364 | AGAP002403 | downstream |             |                                                                                                                                                         |
| 0.00086079 | 20969364 | AGAP002404 | upstream   |             | cullin 5                                                                                                                                                |
| 0.00086079 | 20969364 | AGAP002405 | downstream |             |                                                                                                                                                         |
| 0.00087222 | 24060865 | AGAP002610 | downstream | FBgn0029939 |                                                                                                                                                         |
| 0.00088433 | 19317689 | AGAP002315 | intron     | FBgn0039705 |                                                                                                                                                         |
| 0.0008958  | 24498919 | AGAP002628 | intron     |             |                                                                                                                                                         |
| 0.00091999 | 22132810 | AGAP002509 | 3' UTR     | FBgn0260049 | Flr (flare); actin-interacting; promotes F-actin disassembly                                                                                            |
| 0.00091999 | 22132810 | AGAP002511 | downstream | FBgn0052227 | Gogo (golden goal); thrombospondin; axon guidance                                                                                                       |
| 0.00093225 | 22852334 | AGAP002560 | intron     |             |                                                                                                                                                         |
| 0.00093225 | 22852334 | AGAP002561 | downstream |             |                                                                                                                                                         |

†blank gene description means no available function annotation
